# Supplementary material
Source: Elsevier journal article supplement (https://www.sciencedirect.com/science/article/pii/S2173572717300942)
Supplement: mmc1 [file S2173572717300942:mmc1.docx]

**Tabla 1 Resumen de las características de los estudios**

| **Autor, año y**  **país** | **Diseño y**  **análisis** | **Calidad metodológica CASPe** | **Criterios de inclusión** | **Criterios de exclusión** | **Tamaño muestral y**  **período de**  **estudio** | **Número**  **de pacientes con UPP** |
| --- | --- | --- | --- | --- | --- | --- |
| Llaurado-Serra et al  2016  España | Cohorte prospectivo  multicéntrico  Regresión logística | Fuerte | Pacientes ≥ 18 años ≥ 48 horas de VM  Determinación del grado de elevación del cabecero en las primeras 24 horas de VM | Pacientes con UPP al ingreso en UCI o UPP desarrolladas en las primeras 24 horas Contraindicación de posición semiincorporada desde su ingreso VMNI, VM durante los últimos 7 días o intubación en entorno prehospitalario | 276 pac.  9 meses | 25 pac. |
| Cox y Roche  2015  EEUU | Cohorte retrospectivo  Regresión logística | Moderada | Pacientes ≥ 18 años  Estancia en UCI > 24 horas  Recibir tratamiento con vasopresores | Pacientes con UPP al ingreso en UCI | 306 pac.  12 meses | 41 pac. |
| Tayyib et al  2015  Arabia Saudí | Cohorte prospectivo  Regresión logística | Moderada | Pacientes ≥ 18 años | Pacientes con UPP al ingreso en UCI o UPP desarrolladas en las primeras 24 horas de ingreso. | 84 pac.  30 días | 33 pac. |
| Catalá Espinosa et al  2014  España | Casos y controles  Regresión logística | Fuerte | Controles:  Estancia en UCI > 24 horas  Recibir ventilación mecánica | Pacientes con UPP al ingreso | 308 pac.  15 meses | 77 pac. |
| Nassaji et al  2014  Irán | Cohorte prospectivo  Regresión logística | Moderada | Varones  > 18 años  Estancia en UCI >24 horas | Pacientes con UPP al ingreso  No evaluados en las 24 horas tras admisión  Procedencia de otras plantas del hospital Muerte durante el período de estudio antes del desarrollo de la UPP. | 352 pac.  9 meses | 90 pac. |
| O´Brien et al  2014  EEUU | Cohorte retrospectivo  Regresión logística | Moderada | Estancia en UCI > 48 horas  Ausencia de UPP en el momento del ingreso  Pacientes sometidos a intervención quirúrgica  Desarrollo de UPP en estadio II o superior. | NR | 2695 pac.  18 meses | 288 pac. |
| Ülker y Yapucu  2013  Turquía | Cohorte prospectivo  Regresión logística | Moderada | Pacientes ≥ 18 años  Estancia hospitalaria esperada ≥ 7 días  Ausencia de UPP al ingreso en UCI  Puntuación Braden <12 | NR | 70 pac.  7 meses | 20 pac. |
| **Tabla 1 continuación** | | | | | | |
| **Autor, año y**  **país** | **Diseño y**  **análisis** | **Calidad metodológica CASPe** | **Criterios de inclusión** | **Criterios de exclusión** | **Tamaño muestral y**  **período de**  **estudio** | **Número**  **de pacientes con UPP** |
| Cremasco et al  2012  Brasil | Cohorte prospectivo  Regresión logística | Fuerte | Ausencia de UPP en el momento de ingreso en UCI  Estancia en UCI ≥ 24 horas | NR | 160 pac.  6 meses | 55 pac. |
| Tescher et al  2012  EEUU | Cohorte retrospectivo  Riesgos proporcionales de Cox paso a paso | Moderada | Pacientes ≥ 18 años  Puntuación Braden ≤ 18  Autorización para realizar la investigación | UPP al ingreso  Estancia en UCI < 24 horas  UPP en estadío I | 12566 pac.  12 meses | 416 pac. |
| Roca-Biosca et al  2012  España | Cohorte prospectivo  Riesgos proporcionales de Cox | Fuerte | Pacientes > 18 años  Estancia en UCI > 24 horas  UPP al ingreso no contabilizándose la UPP presente | NR | 236 pac.  9 meses | 26 pac |
| Cox  2011  EEUU | Cohorte retrospectivo  Regresión logística | Moderada | Pacientes ≥ 18 años  Estancia en UCI ≥ 24 horas | UPP al ingreso en UCI | 347 pac.  8 meses | 65 pac. |
| Kaitani et al  2010  Japón | Cohorte prospectivo  Regresión logística | Fuerte | Pacientes ≥ 20 años  Ausencia de UPP al ingreso  Estancia en UCI > 24 horas | Pacientes que puedan realizar frecuentes cambios de posición sin ayuda | 98 pac.  3meses | 14 pac. |
| Slowikowski and Funk  2010  EEUU | Cohorte prospectivo  Regresión logística | Moderada |  | NR | 369 pac.  3años y 2 meses | 88 pac. |
| Manzano et al  2010  España | Cohorte prospectivo  Regresión logística | Moderada | Pacientes sometidos a VM con tubo endotraqueal o VMNI  > 24 horas durante su estancia en UCI  UPP en estadios ≥ II | Pacientes < 18 años Embarazadas  Pacientes con UPP al ingreso en UCI | 299 pac.  5 meses | 47 pac. |
| Yepes et al  2009  Colombia | Cohorte prospectivo  Regresión logística | Moderada | Pacientes intubados en VM y con soporte vasopresor  UPP en estadios ≥ II | Pacientes con UPP al ingreso en UCI | 150 pac.  12 meses | 40 pac. |

| **Tabla 1 continuación** | | | | | | |
| --- | --- | --- | --- | --- | --- | --- |
| **Autor, año y**  **país** | **Diseño y**  **análisis** | **Calidad metodológica CASPe** | **Criterios de inclusión** | **Criterios de exclusión** | **Tamaño muestral y**  **período de**  **estudio** | **Número**  **de pacientes con UPP** |
| Nijs et al  2009  Bélgica | Cohorte prospectivo  Regresión logística | Fuerte | Estancia en UCI > 24 horas  UPP en estadios ≥ II | Pacientes < 16 años  Pacientes quemados  UPP al ingreso en UCI  Pacientes con datos perdidos  Pacientes con UPP en las 24 horas tras admisión en la primera fase  Pacientes con UPP en las 48 horas tras admisión en la segunda fase | 1ª fase 463 pac.  2ª fase 444 pac.  3 meses y 19 días | 115 pac |
| Sayar et al  2008  Turquía | Cohorte prospectivo  Regresión logística | Moderada | Paciente en riesgo o alto riesgo de desarrollo de UPP al ingreso según escala de Waterlow | Paciente con UPP al ingreso en UCI | 140 pac.  1mes y 15 días | 20 pac. |

VM: ventilación mecánica; VMNI: ventilación mecánica no invasiva; UPP: úlcera por presión; UCI: Unidad de Cuidados Intensivos; NR: no registrado.
