# Supplementary material
Source: Elsevier journal article supplement (https://www.sciencedirect.com/science/article/pii/S2173572717300942)
Supplement: mmc2 [file S2173572717300942:mmc2.docx]

**Tabla 2: Sumario de evidencia para factores de riesgo**

| **Dominio**  Subdominio | Estudios con factor de  riesgo en modelo  multivariante | Riesgo:  OR (IC 95%); p | Estudios con variable  significativa en análisis  univariante | Riesgo:  OR (IC 95%); p |
| --- | --- | --- | --- | --- |
| **Características demográficas** |  |  |  |  |
| Edad | Tayyib et al. Todos estadios  Nassaji et al.  O´Brien et al.  Cox J.  Slowikowski and Funk.  Manzano et al. | 1,25 (1,05-1,49); 0,011  1,05(1,03-1,07); <0,001  1,02(1,01-1,03); <0,001  1,03(1,00-1,06); 0,03  2,14(1,27-3,62); 0,004  1,04(1,01-1,07); 0,004 | Ülker y Yapucu.  Tescher et al:  55-65 años  65-75 años  >75 años | NR; p = 0,02  1,52(1,13-2,06); <0,001  1,59(1,19-2,13); <0,001  1,91(1,44-2,52); <0,001 |
| Sexo hombre | Ülker y Yapucu.  Cremasco et al. | 0,15(0,03-0,71); 0,01  5,60(1,42-22,09); 0,014 | Kaitani et al. | NR; p = 0,048 |
| **IMC** | O´Brien et al:  IMC < 18,5 Kg/m2 | 2,70(1,45-5,04); 0,002 | Catalá et al.  ≥40 Kg/m2  Nassaji et al.  >IMC  Tescher et al:  <18 Kg/m2  25-30 Kg/m2  >30 Kg/m2  Roca-Biosca et al.  >30 Kg/m2 | 3,23(1,17-8,93); 0,024  NR; p = 0,029  1,65(1,00-2,72); 0,013  0,77(0,60-0,98); 0,013  0,94(0,71-1,25); 0,013  1,04(1,01-1,08); 0,016  2,51(1,10-5,74); 0,029 |
| **Factor tiempo** |  |  |  |  |
| Tiempo de estancia en UCI | Llaurado-Serra et al.  Tayyib et al. Todos los estadios  Tayib et al.  Estadios II-IV  Nassaji et al.  Cremasco et al.  Cox J.  Yepes et al.  Sayar et al. | 1,02 (1,01-1,04); 0,014  1,83 (1,01-3,30); 0,045  1,23 (1,08-1,39; 0,001  1,19(1,13-1,25); <0,001  1,12(1,04-1,20); 0,002  1,01(1,00-1,01); <0,01  1,13(1,06-1,22); 0,005  1,20(1,11-1,30); 0,000 | Cox y Roche.  Catalá et al.  Manzano et al. | NR; p<0,001  NR; p<0,001  NR; p<0,001 |
| Duración estancia hospitalaria |  |  | Cox y Roche.  Cremasco et al. | NR; p<0,001  NR; p = 0,025 |
| Estancia hospitalaria previa |  |  | Manzano et al. | NR; p<0,001 |
| Periodo invernal | Manzano et al. | 4,60(1,99-10,59); <0,001 |  |  |
| Hospitalización tras cirugía | Tescher et al.  < 5 días tras cirugía  ≥ 5 días tras cirugía | 0,21(0,14-0,31); <0,001  0,25(0,19-0,33); <0,001 |  |  |
|  |  |  |  |  |
| **Tipo de admisión** | Kaitani et al. | 0,04(0,00-0,47); 0,01 | Tayyib et al. Todos los estadios  Manzano et al. | NR; p = 0,043  NR; p = 0,03 |
| **Comorbilidades** |  |  |  |  |
|  |  |  |  |  |
| Hábito tabáquico | Nassaji et al. | 1,03(1,01-1,06); 0,003 |  |  |
| Diabetes | Nassaji et al.  Slowikowski and Funk. | 5,58(1,83-18,70); 0,003  1,93(1,11-3,35); 0,019 | O´Brien et al. | 1,42(1,07-1,88); 0,02 |
| Enfermedad vascular previa | Nijs et al 1ª Fase  Nijs et al 2ª Fase | 4,51(1,99-10,24); <0,001  2,85(1,29-6,30); 0,001 |  |  |
| Enfermedad cardíaca | O´Brien et al. | 1,78(1,27-2,49); 0,001 | Tayyib et al. Todos los estadios. | NR; p = 0,03 |
| **Tabla 2 (continuación)** | | | | |
| **Dominio**  Subdominio | Estudios con factor de riesgo en modelo multivariante | Riesgo:  OR (IC 95%); p | Estudios con variable  significativa en análisis  univariante | Riesgo:  OR (IC 95%); p |
| Hipertensión arterial |  |  | Nassaji et al. | NR; p = 0,006 |
| Enfermedad hepática |  |  | O´Brien et al. | 1,67(1,19-2,33); 0,002 |
| Fracaso renal | O´Brien et al. | 1,75(1,27-2,39); 0,001 |  |  |
| **Diagnóstico de ingreso** |  |  |  |  |
| Trauma | Nassaji et al. | 15,95(3,72-68,65); <0,001 |  |  |
| Cirugía no cardíaca | O´Brien et al. | 1,84(1,31-2,59); <0,001 |  |  |
| Patología digestiva |  |  | Nijs et al. 1ª Fase | 2,51(1,21-5,20); 0,013 |
| Enfermedad coronaria |  |  | Catalá et al. | NR; p = 0,023 |
| Infección | Yepes at al. | 2,89(1,16-7,22); 0,023 |  |  |
|  |  |  |  |  |
| **Edema** |  |  | Kaitani et al.  Slowikowski and Funk. | NR; p = 0,029  NR; NR |
| **Parada cardíaca** | Cox y Roche. | 3,84 (0,99-15,18); 0,05 |  |  |
| **Nivel de conciencia** |  |  |  |  |
| Escala de Glasgow |  |  | Nassaji et al.  Nijs et al. 1ª Fase  GCS apertura espontánea ojos  GCS respuesta motora localización del dolor  GCS respuesta motora obedece órdenes  Nijs et al. 2ª Fase  GCS apertura espontánea ojos  GCS respuesta motora localización del dolor  GCS respuesta motora obedece órdenes | NR; p< 0,001  0,53(0,31-0,89); 0,017  4,54(1,31-15,71);0,017  0,42(0,25-0,73); 0,002  0,39(0,21-0,71); 0,002  4,24(1,16-15,51);0,029  0,26(0,13-0,49);<0,0001 |
| **Parámetros vitales** |  |  |  |  |
| Tiempo de PAM<60-70mmHg | Llaurado-Serra et al.  Cox y Roche. | 1,02 (1,01-1,03; 0,004  1,09 (1,02-1,17); 0,01 | Cox J. | NR; p≤0,05 |
| Tiempo de PAS <90mmHg |  |  | Cox J. | NR; p≤0,05 |
| Tiempo de PAD <60mmHg |  |  | Cox J. | NR; p≤0,01 |
| PaO2 / FiO2 primer día |  |  | Manzano et al. | NR; p = 0,007 |
| Temperatura ≥ 38,5ºC | Nijs et al. 1ª Fase | 0,18(0,18-0,92); 0,029 |  |  |
| **Incontinencia fecal** | Nassaji et al. | 3,42(1,45-8,06); 0,005 |  |  |
|  |  |  |  |  |
| **Dieta**  Días con dieta hiperproteica |  |  | Roca-Biosca et al. | 0,946(0,90-0,99); <0,01 |
| **Tabla 2 (continuación)** | | | | |
| **Dominio**  Subdominio | Estudios con factor de riesgo en modelo multivariante | Riesgo:  OR (IC 95%); p | Estudios con variable  significativa en análisis  univariante | Riesgo:  OR (IC 95%); p |
| **Medicación** |  |  |  |  |
| Aminas | Llaurado-Serra et al.  Cox y Roche.  Nijs et al.1ª Fase  Roca-Biosca et al. | 1,02 (1,01-1,03); <0,001  4,81 (1,66-13,92); 0,004  6,05(1,88-19,54); 0,003  3,68(1,12-12,06); 0,031 | Catalá et al.  Nijs et al. 2ª Fase  Cox J. | 3,35(1,82-6,18); <0,001  2,18(1,09-4,34); 0,027  NR; p≤0,01 |
| Sedación | Llaurado-Serra et al.  Nijs et al. 1ª Fase  Nijs et al. 2ª Fase | 1,02 (1,01-1,03); <0,001  0,30(0,13-0,70); 0,006  0,27(0,11-0,65); 0,004 |  |  |
| Tiempo de sedación | Roca-Biosca et al. | 0,90(0,83-0,99); 0,036 |  |  |
| Corticoides |  |  | O´Brien et al. | 1,59(1,01-2,50); 0,04 |
| **Administración de hemoderivados** |  |  | Catalá et al. | 3,30(1,89-5,76); <0,001 |
|  |  |  |  |  |
| **Dispositivos** |  |  |  |  |
| Días con sonda nasogástrica de poliuretano |  |  | Roca-Biosca et al. | 0,94(0,90-0,98); 0,006 |
| Ventilación mecánica | Nijs et al. 2ª Fase  O´Brien et al. | 4,82(1,74-13,36); 0,003  5,28(3,63-7,67); <0,001 | Tayyib et al. Todos los estadíos.  Tayib et al. Estadios II-IV.  Slowikowski and Funk.  Nijs et al. 1ª Fase | NR; p = 0,015  NR; p = 0,017  NR; NR  2,20(1,24-3,92); 0,007 |
|  |  |  |  |  |
| Tiempo de ventilación mecánica | Llaurado-Serra et al.  Cox y Roche.  Catalá et al.  Manzano et al. | 1,03 (1,00-1,06); 0,029  23,60(6,42-86,66); <0,001  1,08 (1,01-1,16); 0,013  1,04(1,00-1,08); 0,024 |  |  |
|  |  |  |  |  |
| Depuración extrarrenal o diálisis intermitente | Catalá et al.  Nijs et al. 1ª Fase  Nijs et al. 2ª Fase | 3,55 (1,31-9,64); 0,013  3,77(1,03-13,86); 0,045  9,43(3,01-29,51); 0,001 | Slowikowski and Funk. | NR; NR |
| Traqueostomía |  |  | Catalá et al. | 6,62(3,23-13,6); <0,001 |
| **Complicaciones** |  |  |  |  |
| Fallo respiratorio agudo | Tescher et al. | 2,68(2,16-3,33); <0,001 |  |  |
| Infección, shock séptico |  |  | Cox J.  Manzano et al. | NR; p≤0,01  NR; p = 0,004 |
| Neumonía asociada a ventilación mecánica |  |  | Catalá et al.  Manzano et al. | 20,23(4,37-93,65);<0,001  NR; p = 0,003 |
| Infección urinaria asociada a sonda |  |  | Catalá et al. | 5,56(1,76-17.59); 0,004 |
| Fracaso renal agudo |  |  | Catalá et al.  Tescher et al. | 2,64(1,54-5,52); <0,001  2,00(1,59-2,52); <0,001 |
| **Valores hematológicos** |  |  |  |  |
| Hemoglobina | Nassaji et al. | 2,68(1,22-5,91); 0,014 | Nijs et al. 2ª Fase | 0,78(0,64-0,95); 0,015 |
| Albúmina | Llaurado-Serra et al.  Niveles séricos altos  Ülker y Yapucu.  Niveles séricos bajos | 0,62 (0,39-0,98); 0,041  11,62(1,92-70,4); <0,01 |  |  |
| **Tabla 2 (continuación)** | | | | |
| **Dominio**  Subdominio | Estudios con factor de riesgo en modelo multivariante | Riesgo:  OR (IC 95%); p | Estudios con variable  significativa en análisis  univariante | Riesgo:  OR (IC 95%); p |
| Prealbúmina | Llaurado-Serra et al. |  |  |  |
| Proteína C-reactiva |  |  | Sayar et al. | NR; p<0,05 |
| **Medidas de prevención** |  |  |  |  |
| Superficie dinámica | Nijs et al. 1ª Fase  Nijs et al. 2ª Fase | 30,21(12,20-74,77); <0,001  3,63(1,09-12,05); 0,035 |  |  |
| Tiempo sobre superficie dinámica | Roca-Biosca et al. | 0,87(0,81-0,94); 0,000 |  |  |
|  |  |  |  |  |
| Cambios posturales | Kaitani et al.  Nijs et al. 1ª Fase  Cambios posturales infrecuentes  Tayyib et al. Todos los estadios.  Tayib et al. Estadios II-IV | 0,45(0,21-0,97); 0,04  6,66(2,70-16,44); <0,001  250,04(5,23-11954,16); 0,005  2,96 (1,23-7,15); 0,015 |  |  |
| Días con cambios posturales |  |  | Roca-Biosca et al. | 0,88(0,82-0,94); <0,01 |
| No reposicionamiento |  |  | Slowikowski and Funk. | NR; p = 0,019 |
| Talones flotantes | Nijs et al. 2ª Fase | 3,82(1,66-8,78); 0,002 | Nijs et al. 1ª Fase | 4,05(2,43-6,73);<0,0001 |
| Sedestación | Nijs et al. 1ª Fase | 0,08(0,02-0,27); <0,001 | Nijs et al. 2ª Fase | 0,30(0,11-0,87); 0,026 |

NR: no registrado; IMC: índice de masa corporal; UCI: Unidad de Cuidados Intensivos; GCS: Glasgow Coma Scale;

PAM: Presión arterial media; PAS: Presión arterial sistólica; PAD: Presión arterial diastólica; PaO2 / FiO2: presión parcial de O2 en sangre arterial/fracción inspirada de O2.
